# Supplementary material for: Combining Classic and Novel Neutrophil-Related Biomarkers to Identify Non-Small-Cell Lung Cancer
Source: MDPI journal article supplement (doi:10.3390/cancers16030513), 2024-01-25
Supplement: s1 [file s1]

## Supplementary Tables

**Supplementary Table S1.** Host characteristics of the study participants in stage 1.

| Characteristics          | Control<br>(n=6791)    | NSCLC (n=3942)         |                        |                        | P<br>value* |
|--------------------------|------------------------|------------------------|------------------------|------------------------|-------------|
|                          |                        | Tis (n=450)            | Early (n=3376)         | Late (n=116)           |             |
| Age                      | 35.266 [29.465-46.770] | 50.340 [40.345-58.686] | 58.215 [48.679-65.804] | 62.865 [55.904-68.591] | <0.001      |
| Sex                      |                        |                        |                        |                        |             |
| Male                     | 3160 (46.53)           | 326 (72.44)            | 2197 (65.08)           | 50 (43.10)             | <0.001      |
| Female                   | 3631 (53.47)           | 124 (27.56)            | 1179 (34.92)           | 66 (56.90)             |             |
| BMI (kg/m <sup>2</sup> ) | 23.097 [20.942-25.562] | 22.788 [21.145-24.825] | 23.125 [21.226-25.182] | 23.718 [21.476-25.671] | 0.192       |
| Smoking status           |                        |                        |                        |                        |             |
| Never                    | 4829 (71.11)           | 389 (86.44)            | 2621 (77.64)           | 66 (56.90)             | <0.001      |
| Ever                     | 1281 (18.86)           | 60 (13.33)             | 746 (22.10)            | 50 (43.10)             |             |
| Missing                  | 681 (10.00)            | 1 (0.20)               | 9 (0.30)               | 0 (0)                  |             |
| T stage                  |                        |                        |                        |                        |             |
| T1                       | -                      | -                      | 3231 (95.70)           | 63 (54.31)             | -           |
| T2                       | -                      | -                      | 139 (4.12)             | 31 (26.72)             |             |
| T3                       | -                      | -                      | 6 (0.18)               | 12 (10.34)             |             |
| T4                       | -                      | -                      | -                      | 10 (8.62)              |             |
| N stage                  |                        |                        |                        |                        |             |
| N0                       | -                      | -                      | 3323 (98.43)           | 14 (12.07)             | -           |
| N1                       | -                      | -                      | 53 (1.57)              | 7 (6.03)               |             |
| N2                       | -                      | -                      | -                      | 95 (81.90)             |             |
| M stage                  |                        |                        |                        |                        |             |
| M0                       | -                      | -                      | 3376 (100.00)          | 92 (79.31)             | -           |
| M1                       | -                      | -                      | -                      | 24 (20.69)             |             |

Early stage indicates stage I&II disease, late stage indicates stage III&IV disease, the staging criteria according to NCCN Clinical Practice Guidelines Non-small cell lung cancer v1, 2022.

NSCLC, non-small cell lung cancer; Tis, carcinoma in situ; SD, standard deviation; BMI, body mass index.

\*P indicates the difference across controls, Tis, early-stage NSCLC and late-stage NSCLC.

Values are presented as n (%) unless otherwise specified.

**Supplementary Table S2.** The associations between classic blood neutrophil-related biomarkers and NSCLC risk in stage 1.

| Markers | Control<br>(n=6791) | NSCLC<br>(n=3942) | OR (95%CI)*             | P value* | OR (95%CI)<br>**, a     | P value**, a |
|---------|---------------------|-------------------|-------------------------|----------|-------------------------|--------------|
| NLR     |                     |                   |                         |          |                         |              |
| Low     | 3394 (49.98)        | 989 (25.09)       | 1 (ref)                 |          | 1 (ref)                 |              |
| High    | 3397 (50.02)        | 2953 (74.91)      | 2.983 (2.737,<br>3.252) | <0.001   | 2.608 (2.333,<br>2.918) | <0.001       |
| NEU     |                     |                   |                         |          |                         |              |
| Low     | 3368 (49.60)        | 1416 (35.92)      | 1 (ref)                 |          | 1 (ref)                 |              |
| High    | 3423 (50.40)        | 2526 (64.08)      | 1.755 (1.620,<br>1.902) | <0.001   | 2.222 (1.994,<br>2.477) | <0.001       |
| LYM     |                     |                   |                         |          |                         |              |
| Low     | 3378 (49.74)        | 2741 (69.53)      | 1 (ref)                 |          | 1 (ref)                 |              |
| High    | 3413 (50.26)        | 1201 (30.47)      | 0.434 (0.399,<br>0.471) | <0.001   | 0.650 (0.583,<br>0.724) | <0.001       |

NLR, neutrophil to lymphocyte ratio; NEU, absolute neutrophil counts; LYM, absolute lymphocyte counts; NSCLC, non-small cell lung cancer; OR, odds ratio; CI, confidence interval.

The value of NLR, NEU, and LYM were divided into low and high groups based on the median value in the control group as the cutoff.

<sup>a</sup> Adjusted factors: age+sex+BMI+smoking status.

\* shows the OR (95% CI) and p values from univariate logistic regression analysis.

\*\* shows the OR (95% CI) and p values from multiple logistic regression analysis adjusting for age, sex, BMI, and smoking status.

Values are presented as n (%) unless otherwise specified.

**Supplementary Table S3.** Host characteristics of the subset of the study participants with measurements of novel blood neutrophil-related biomarkers.

| Characteristics                          | Control (n=66)   | NSCLC (n=132)    |                  | P value* |
|------------------------------------------|------------------|------------------|------------------|----------|
|                                          |                  | Tis (n=42)       | IAC (n=90)       |          |
| Age (years) (mean $\pm$ SD)              | 59.80 $\pm$ 8.89 | 53.33 $\pm$ 7.36 | 62.93 $\pm$ 8.73 | 0.956    |
| BMI (kg/m <sup>2</sup> ) (mean $\pm$ SD) | 24.05 $\pm$ 2.60 | 23.21 $\pm$ 2.65 | 23.44 $\pm$ 2.86 | 0.161    |
| Sex                                      |                  |                  |                  |          |
| Male                                     | 32 (48.48)       | 20 (47.62)       | 44 (48.89)       | 0.991    |
| Female                                   | 34 (51.52)       | 22 (52.38)       | 46 (51.11)       |          |
| Smoking status                           |                  |                  |                  |          |
| Never                                    | 46 (69.70)       | 32 (76.19)       | 53 (58.89)       | 0.112    |
| Ever                                     | 20 (30.30)       | 10 (23.81)       | 37 (41.11)       |          |
| Hypertension                             |                  |                  |                  |          |
| No                                       | 41 (62.12)       | 34 (80.95)       | 53 (58.89)       | 0.041    |
| Yes                                      | 25 (37.88)       | 8 (19.05)        | 37 (41.11)       |          |
| Diabetes                                 |                  |                  |                  |          |
| No                                       | 57 (86.36)       | 39 (92.86)       | 85 (94.44)       | 0.191    |
| Yes                                      | 9 (13.64)        | 3 (7.14)         | 5 (5.56)         |          |
| Stage                                    |                  |                  |                  |          |
| Early (I+II)                             | -                | -                | 55 (61.11)       | -        |
| Late (III+IV)                            | -                | -                | 35 (38.89)       |          |
| T stage                                  | -                |                  |                  |          |
| T1                                       | -                | -                | 51 (56.67)       | -        |
| T2                                       | -                | -                | 36 (40.00)       |          |
| T3                                       | -                | -                | 2 (2.22)         |          |
| T4                                       | -                | -                | 1 (1.11)         |          |
| N stage                                  |                  |                  |                  |          |
| N0                                       | -                | -                | 44 (48.89)       | -        |
| N1                                       | -                | -                | 15 (16.67)       |          |
| N2                                       | -                | -                | 31 (34.44)       |          |
| M stage                                  |                  |                  |                  |          |
| M0                                       | -                | -                | 86 (95.56)       | -        |
| M1                                       | -                | -                | 4 (4.44)         |          |

Tis, carcinoma in situ; IAC, invasive adenocarcinoma; NSCLC, non-small cell lung cancer. Early stage indicates stage I&II disease, late stage indicates stage III&IV disease, the staging criteria according to NCCN Clinical Practice Guidelines Non-small cell lung cancer v1, 2022.

\* P indicates the difference across control, Tis and IAC.

Values are presented as n (%) unless otherwise specified.

**Supplementary Table S4.** The difference in novel neutrophil-related biomarkers in stage 2.

| Markers                  | Control (n=66)<br>median [Q1-Q3] | NSCLC (n=132)<br>median [Q1-Q3] | P value |
|--------------------------|----------------------------------|---------------------------------|---------|
| IL-6 (pg/mL)             | 0.312 [0.244-0.513]              | 7.460 [3.511-14.592]            | <0.001  |
| CXCL2 (pg/mL)            | 317.40 [213.73-517.95]           | 378.20 [275.10-517.20]          | 0.178   |
| IL-1RA (pg/mL)           | 205.41 [163.72-266.47]           | 547.20 [361.60-785.10]          | <0.001  |
| IL-1 $\alpha$ (pg/mL)    | 2.598 [1.591-4.130]              | 3.104 [2.118-4.203]             | 0.313   |
| CXCL5 (pg/mL)            | 518.60 [378.00-882.10]           | 642.80 [456.30-833.50]          | 0.565   |
| NLR                      | 1.684 [1.350-2.249]              | 2.471 [1.987-3.197]             | <0.001  |
| NEU (10 <sup>9</sup> /L) | 3.155 [2.710-3.728]              | 3.942 [3.287-4.566]             | 0.001   |
| LYM (10 <sup>9</sup> /L) | 1.815 [1.613-2.163]              | 1.625 [1.361-1.798]             | 0.001   |

NSCLC, non-small cell lung cancer; NLR, neutrophil to lymphocyte ratio; NEU, absolute neutrophil counts; LYM, absolute lymphocyte counts; IL-6, Interleukin 6; IL-1 $\alpha$ , Interleukin 1 alpha; IL-1RA, Interleukin-1 receptor antagonist; CXCL2, C-X-C Motif Chemokine Ligand 2; CXCL5, C-X-C Motif Chemokine Ligand 5.

**Supplementary Table S5.** The comparison of model performance of models with different predictors.

| Models                       | AUC   | 95% CI       | TPR   | FPR   |
|------------------------------|-------|--------------|-------|-------|
| Model 1: BMI+smoking status  | 0.603 | 0.527, 0.678 | 0.742 | 0.606 |
| Model 2: Model 1+NLR+CEA     | 0.716 | 0.637, 0.794 | 0.652 | 0.288 |
| Model 4: Model 2+IL-6        | 0.814 | 0.746, 0.881 | 0.864 | 0.394 |
| Model 5: Model 2+IL-1RA      | 0.807 | 0.742, 0.872 | 0.848 | 0.394 |
| Model 3: Model 2+IL-6+IL-1RA | 0.851 | 0.793, 0.908 | 0.856 | 0.333 |

BMI, body mass index; NLR, neutrophil to lymphocyte ratio; CEA, carcinoembryonic antigen; CI, confidence interval; AUC, area under the receiver operating characteristic curve; IL-6, Interleukin 6; IL-1RA, Interleukin-1 receptor antagonist; TPR, true positive rate; FPR, false positive rate.

## Supplementary Figures

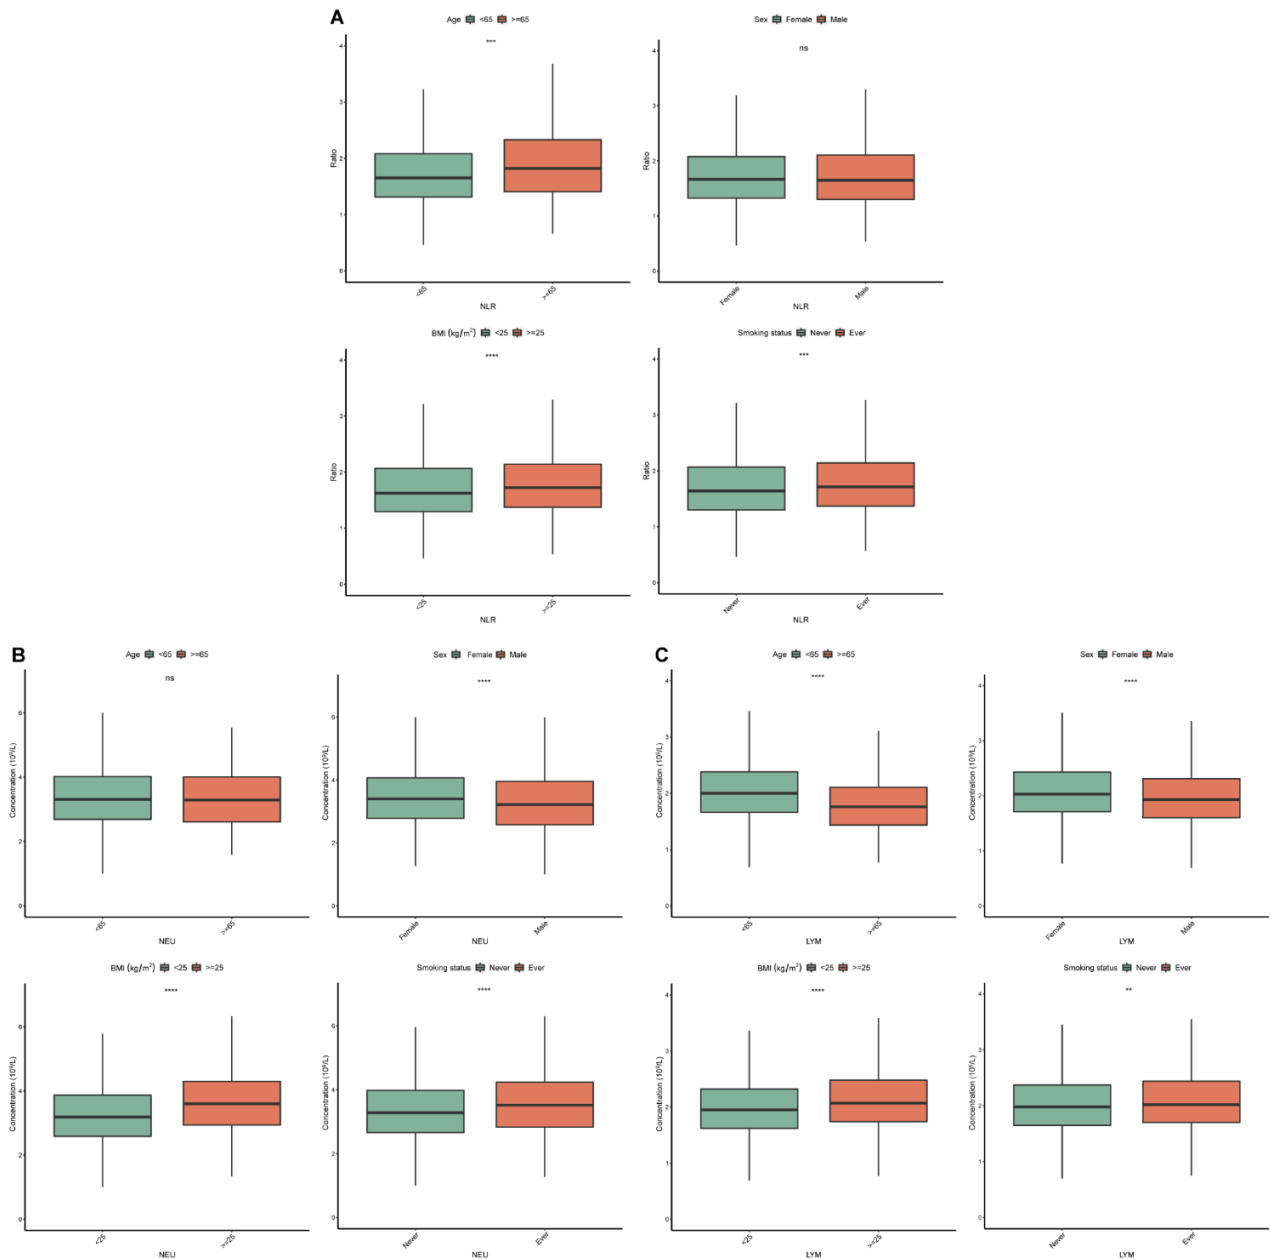

**Supplementary Figure S1.** The distribution of classic blood biomarkers (NLR, NEU, and LYM) across different epidemiological features (age, sex, BMI, and smoking status) among the healthy controls in stage 1.

**(A)** The differential analysis of NLR in different groups among age (upper left), sex (upper right), BMI (low left), and smoking status (low right). **(B)** The differential analysis of NEU in different groups among age (upper left), sex (upper right), BMI (low left), and smoking status (low right). **(C)** The differential analysis of LYM in different groups among age (upper left), sex (upper right), BMI (low left), and smoking status (low right). NLR, neutrophil to lymphocyte ratio; NEU, absolute neutrophil counts; LYM, absolute lymphocyte counts; BMI, body mass index. \*\*  $p < 0.01$ ; \*\*\*  $p < 0.001$ ; \*\*\*\*  $p < 0.0001$ ; ‘ns’ indicates not significant.

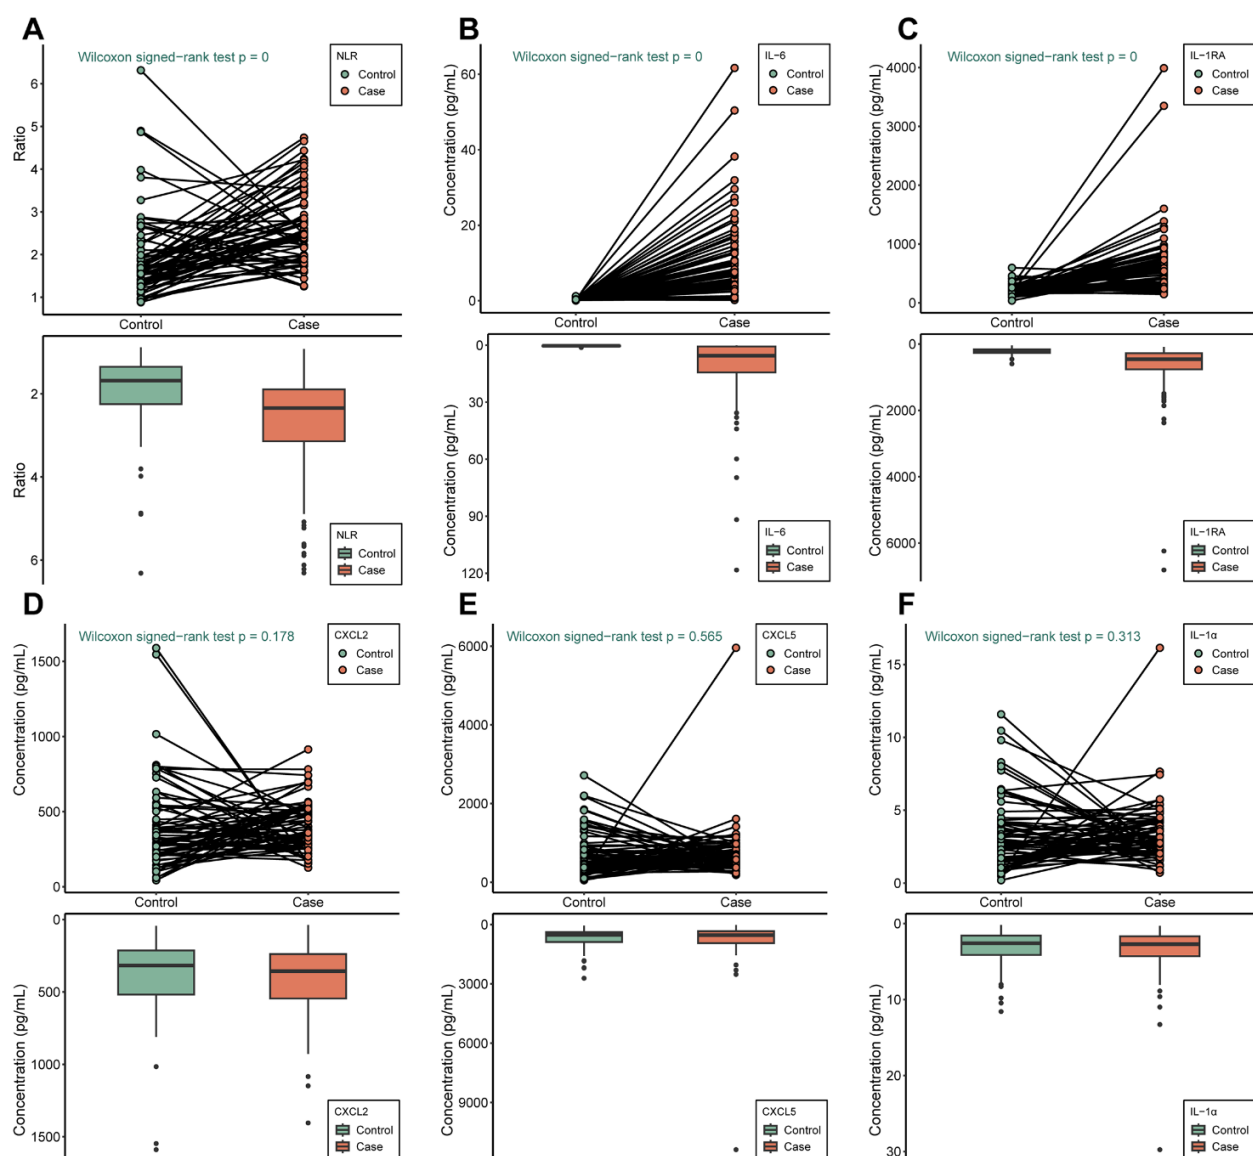

**Supplementary Figure S2.** The differences analysis of blood neutrophil-related biomarkers in paired samples.

(A) The paired samples' differences analysis of NLR. (B) The paired samples' differences analysis of IL-6. (C) The paired samples' differences analysis of IL-1RA. (D) The paired samples' differences analysis of CXCL2. (E) The paired samples' differences analysis of CXCL5. (F) The paired samples' differences analysis of IL-1 $\alpha$ . NLR, neutrophil to lymphocyte ratio; IL-6, Interleukin 6; IL-1RA, Interleukin-1 receptor antagonist; CXCL2, C-X-C Motif Chemokine Ligand 2; CXCL5, C-X-C Motif Chemokine Ligand 5; IL-1 $\alpha$ , Interleukin 1 alpha.



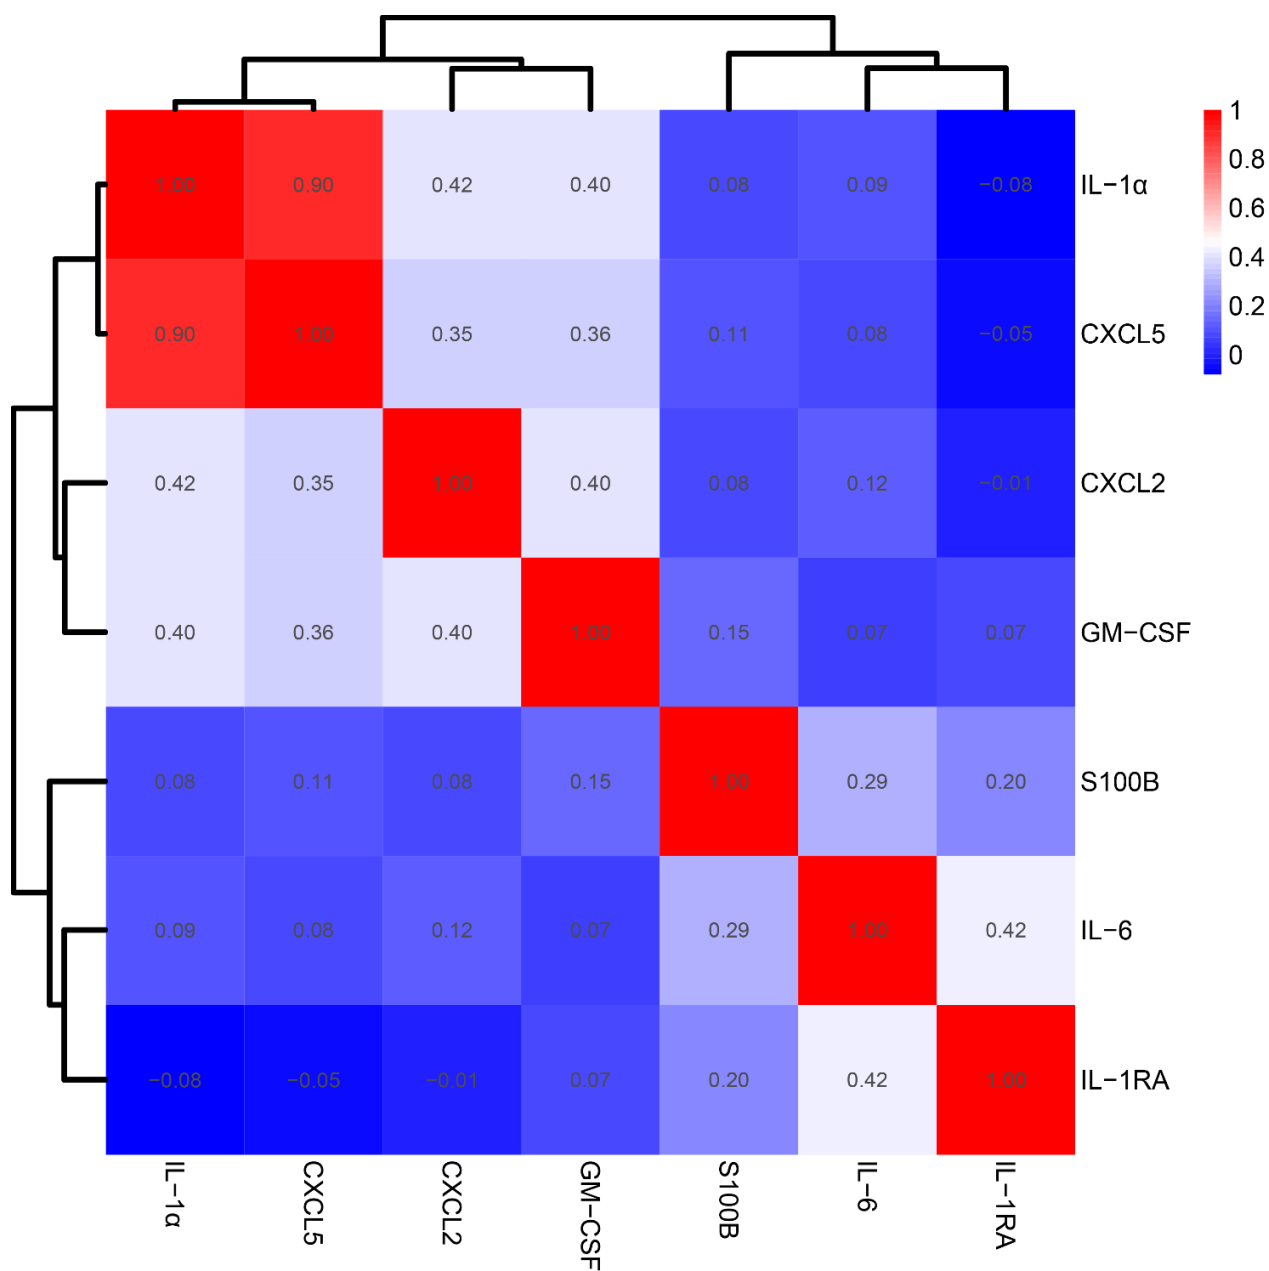

**Supplementary Figure S3.** The pairwise correlations among the novel blood neutrophil-related biomarkers.

IL-6, Interleukin 6; CXCL2, C-X-C motif chemokine ligand 2; IL-1RA, Interleukin-1 receptor antagonist; IL-1α, Interleukin 1 alpha; CXCL5, C-X-C motif chemokine ligand 5; S100B, S100 calcium binding protein B; GM-CSF, granulocyte-macrophage colony stimulating factor.

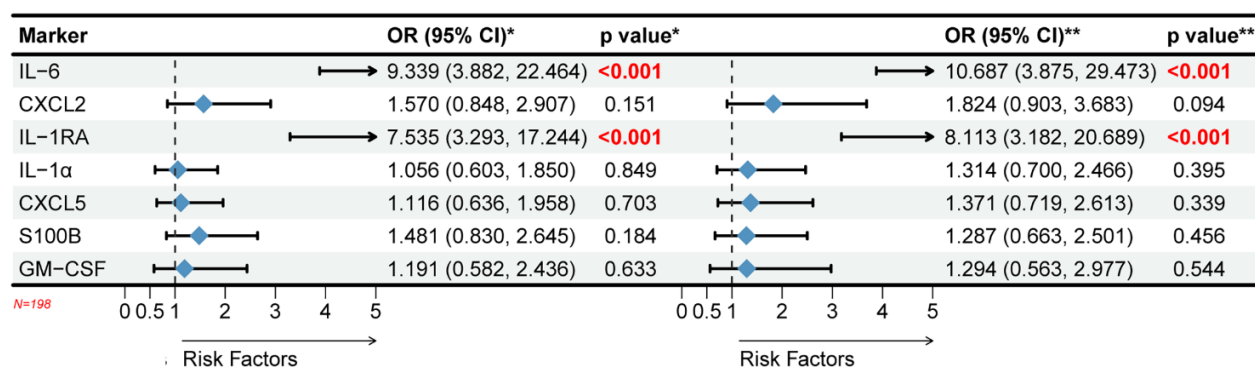

**Supplementary Figure S4.** The associations between novel blood neutrophil-related biomarkers and NSCLC risk in stage 2.

The univariate logistic regression analysis was shown on the left of figure while the multiple logistic regression analysis on the right. In multiple conditional logistic regression analysis, the factors BMI, smoking status, NLR, and CEA were adjusted. \* shows the OR (95%CI) and p values of the univariate conditional logistic regression analysis. \*\* shows the OR (95%CI) and p values of the multiple conditional logistic regression analysis. NLR, neutrophil to lymphocyte ratio; IL-6, Interleukin 6; CXCL2, C-X-C motif chemokine ligand 2; IL-1RA, Interleukin-1 receptor antagonist; IL-1 $\alpha$ , Interleukin 1 alpha; CXCL5, C-X-C motif chemokine ligand 5; S100B, S100 calcium binding protein B; GM-CSF, granulocyte-macrophage colony stimulating factor; OR, odds ratio; CI, confidence interval.
